# Supplementary material for: Inactivation of Cyclin-Dependent Kinase 5 in Hair Cells Causes Hearing Loss in Mice
Source: Front Mol Neurosci. 2018 Dec 11;11:461. doi: 10.3389/fnmol.2018.00461 (PMC6297389; doi:10.3389/fnmol.2018.00461)
Supplement: Supplementary file 1 [file Data_Sheet_1.docx]

**Inactivation of cyclin-dependent kinase 5 in hair cells causes hearing loss in mice**

Xiaoyan Zhai1#, Chengcheng Liu1,2#, Bin Zhao1, Yanfei Wang1, Zhigang Xu1,3,4*

1Shandong Provincial Key Laboratory of Animal Cells and Developmental Biology, School of Sciences, Shandong University, Qingdao, Shandong 266237, China

2Department of Otolaryngology-Head and Neck Surgery, The Second Hospital of Shandong University, Jinan 250033, China

3Shenzhen Research Institute of Shandong University, Shenzhen, Guangdong 518057, China

4Shandong Provincial Collaborative Innovation Center of Cell Biology, Shandong Normal University, Jinan, Shandong 250014, P. R. China

#Contributed equally to this work

*Corresponding author:

Zhigang Xu, E-mail: xuzg@sdu.edu.cn, Tel: 86-532-58630869


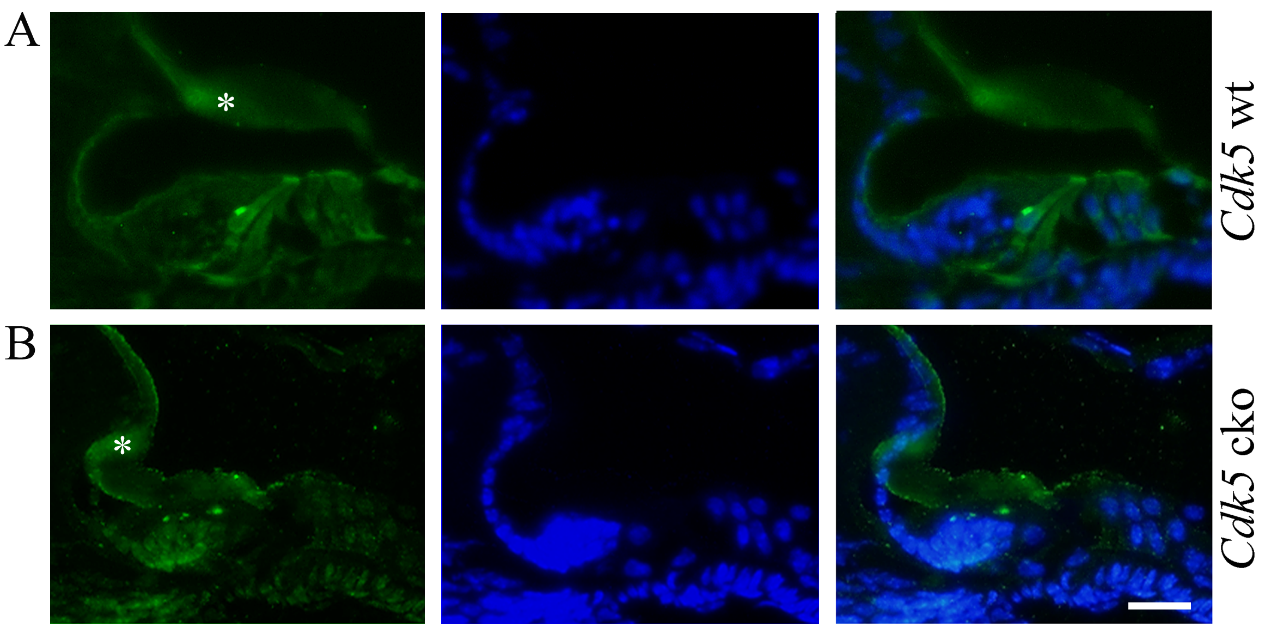


**Fig. S1**. **CDK5 is expressed in mouse auditory hair cells.** Cryosection immunostaining of CDK5 in *Cdk5lox/lox* (A) and *Atoh1Cre/+*;*Cdk5lox/lox* (B) cochleae at P8. Nuclei were visualized by DAPI. Images were taken from the middle turn of mouse cochlea using a confocal microscope. Asterisks indicate unspecific staining of tectorial membrane. Scale bar, 10 μm.

**
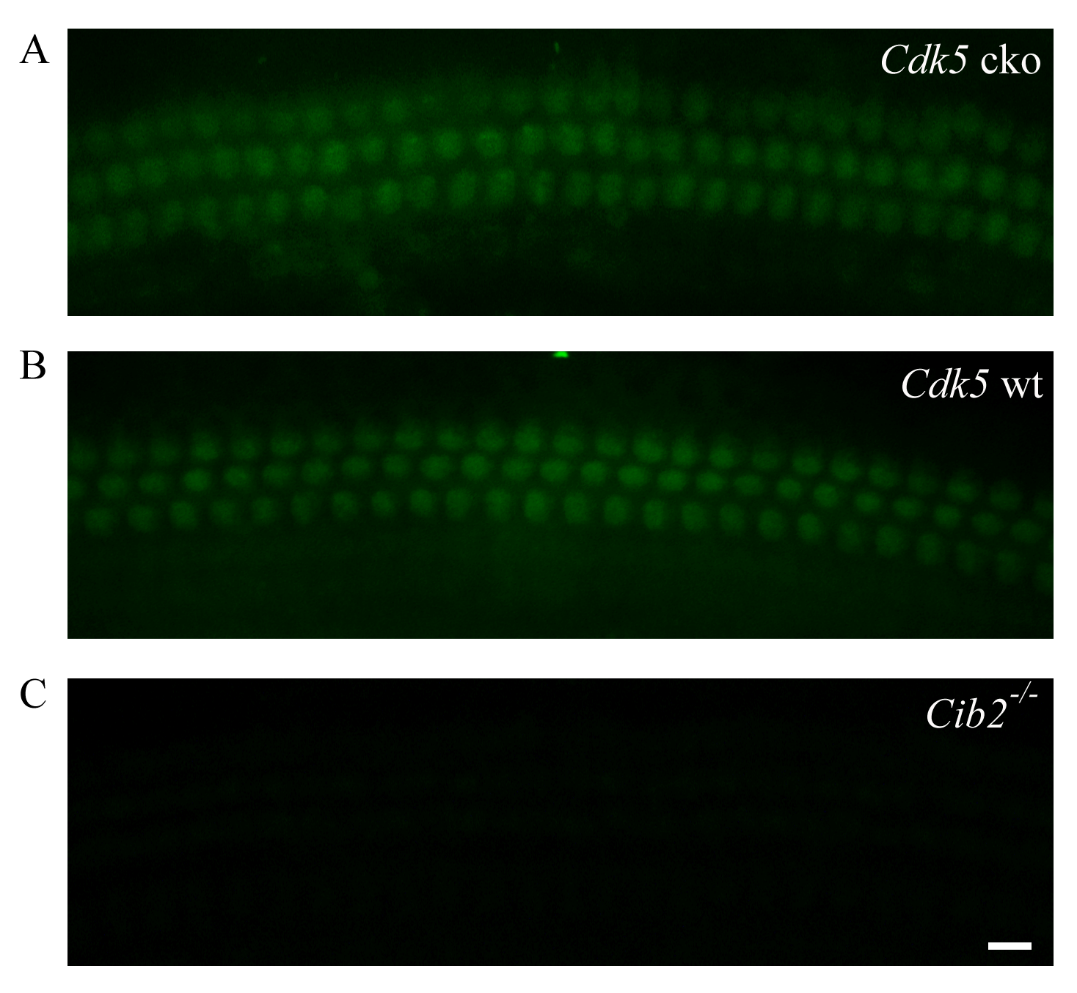
**

**Fig. S2. Hair cells of *Cdk5* cko mice are functionally normal.** FM1-43FX uptake by auditory hair cells of P8 *Atoh1Cre/+*;*Cdk5lox/lox* (A), *Cdk5lox/lox* (B), and *Cib2-/-* (C)mice were examined using an epifluorescence microscope. CIB2 is indispensable for mechanoelectrical transduction of hair cells, hence *Cib2-/-* mice was included in this experiment as negative control. Scale bar, 10 μm.

**
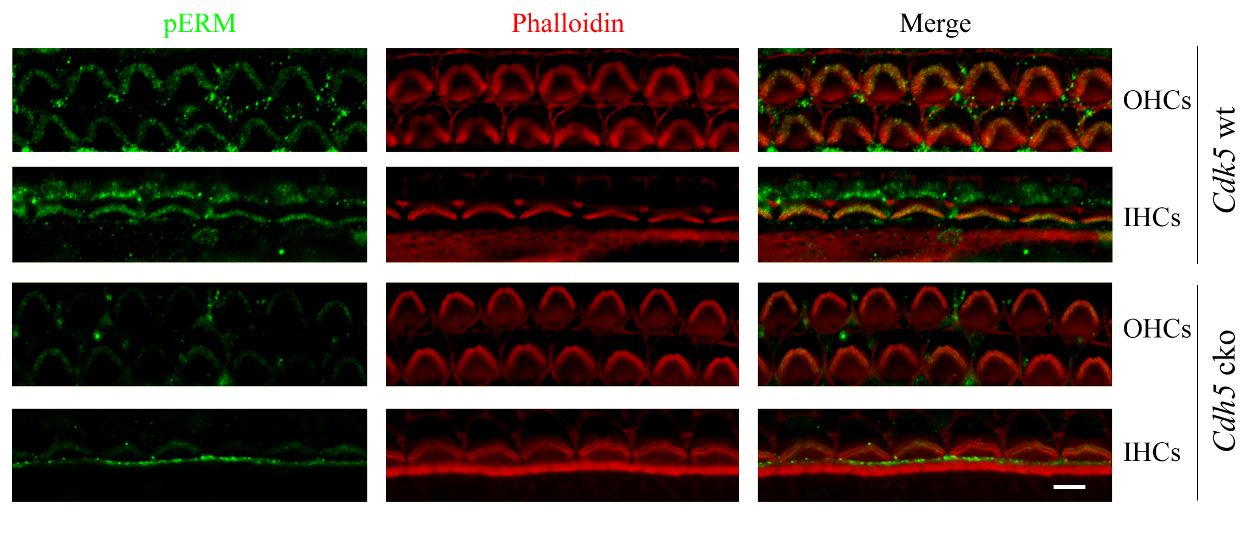
**

**Fig. S3. ERM phosphorylation is reduced by *Cdk5* inactivation.** Whole-mount immunostaining of phosphorylated ERM (pERM) in P4 *Atoh1Cre/+*;*Cdk5lox/lox* and *Cdk5lox/lox* organ of Corti. F-actin core of stereocilia was visualized by TRITC-conjugated phalloidin. Images were taken from the middle turn of cochleae using a confocal microscope. Scale bar, 5 μm.
